# Supplementary material
Source: Springer Nature journal article supplement (https://www.springermedizin.de/resource/supplementary/12902_2014_233_MOESM4_ESM.pdf/9515816)
Supplement: MOESM4 [file 9515816]

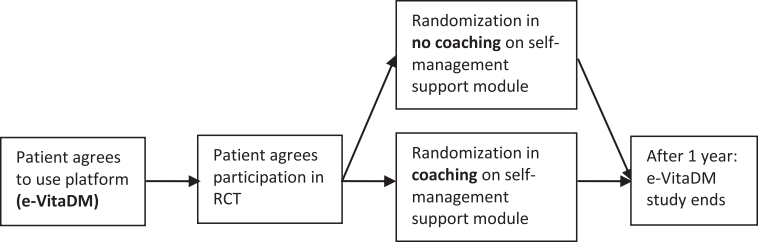

Patient agrees to use platform (e-VitaDM)

Patient agrees participation in RCT

Randomization in **no coaching** on self-management support module

Randomization in **coaching** on self-management support module

After 1 year: e-VitaDM study ends
